# Supplementary material for: Biological and mathematical modeling of melanocyte development
Source: Oxford University Press journal article supplement (doi:10.1242/dev.067447), 2011-08-23
Supplement: dev067447figs1.pdf [file dev067447figs1.pdf]

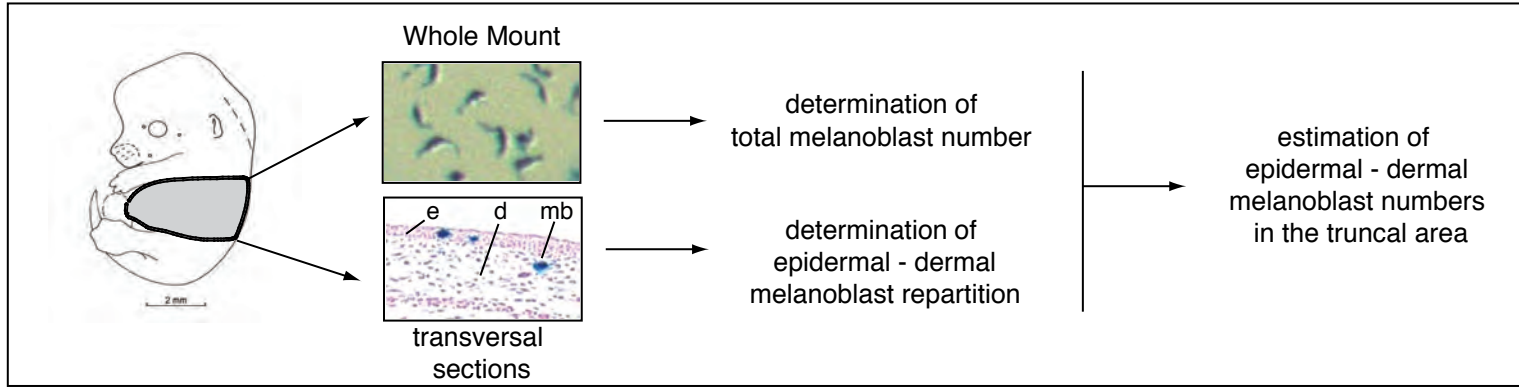

Figure S1: Determination of the number of melanoblasts

Melanoblasts were identified as X-gal-positive cells and were counted in the truncal region between the front and back limbs, from somites 13-25. The number of melanoblasts (mb) was determined from whole mount (wm) and sectioned (s) embryos previously stained with Xgal. epidermis (e), dermis (d).
