# Supplementary material for: Biological and mathematical modeling of melanocyte development
Source: Oxford University Press journal article supplement (doi:10.1242/dev.067447), 2011-08-23
Supplement: dev067447figs2.pdf [file dev067447figs2.pdf]

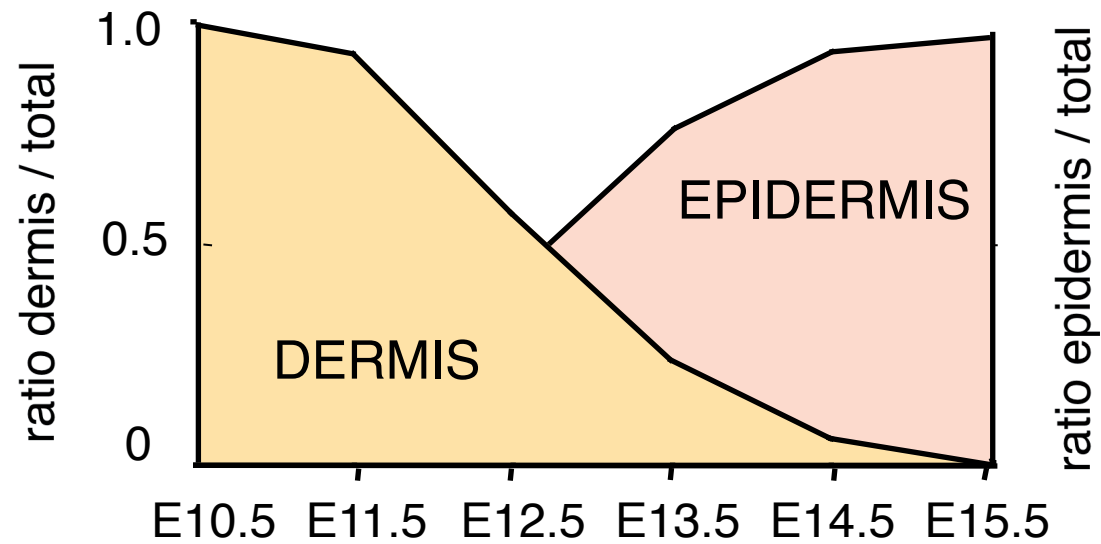

Figure S2: Distribution of epidermal and dermal melanoblasts in the two compartments during development. In the truncal region, melanoblasts start to penetrate into the epidermis on E11.5, and most are located in this compartment by E15.5.
