# Supplementary material for: Biological and mathematical modeling of melanocyte development
Source: Oxford University Press journal article supplement (doi:10.1242/dev.067447), 2011-08-23
Supplement: dev067447figs3.pdf [file dev067447figs3.pdf]

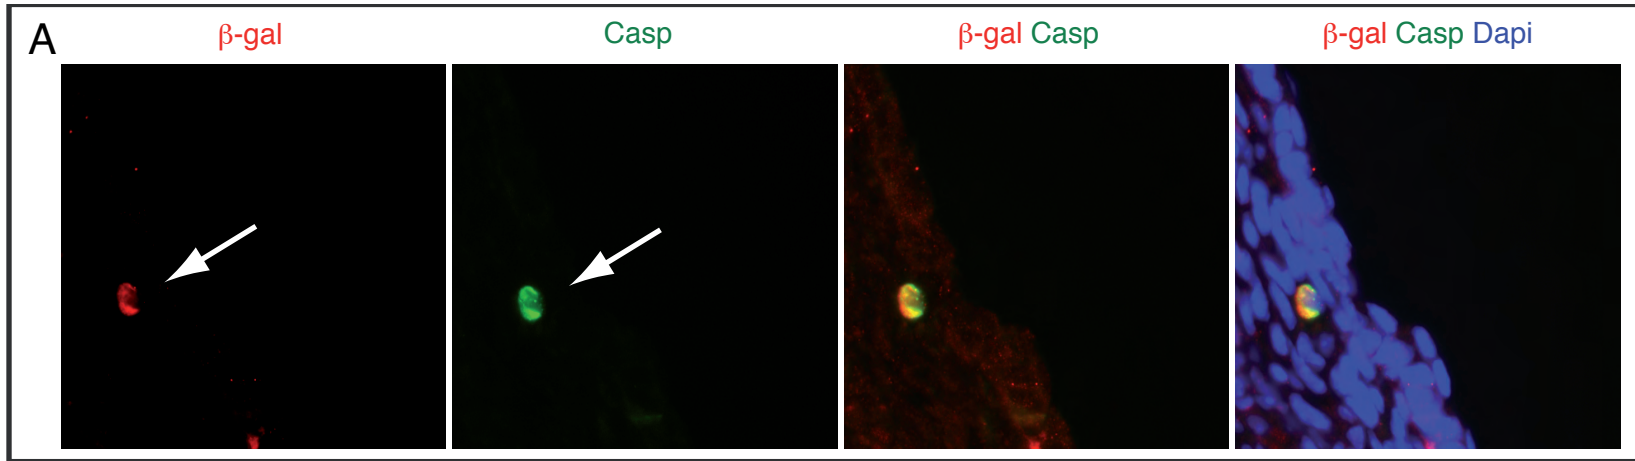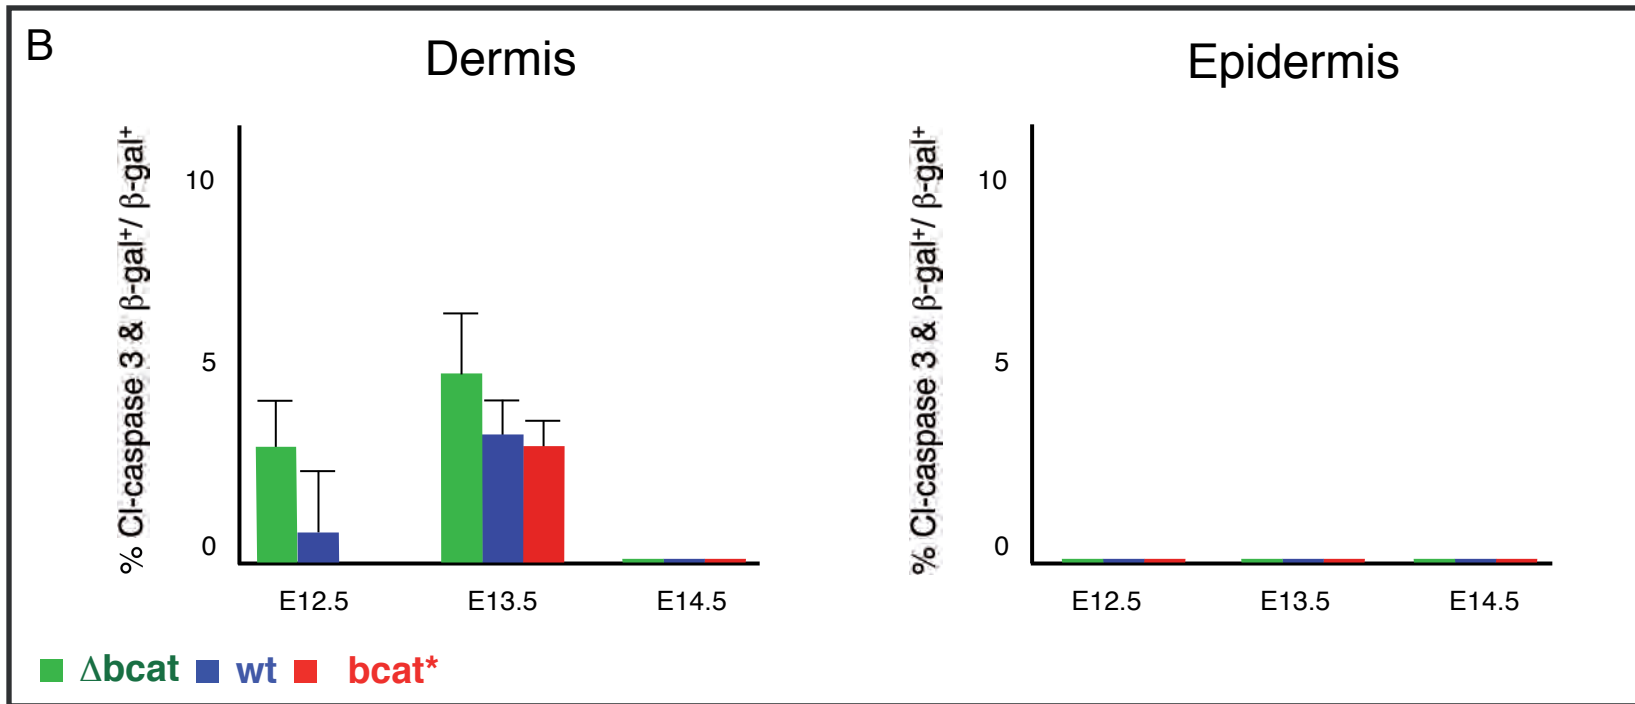

### **Figure S3: Detection of apoptotic melanoblasts in $\beta$ -catenin mutants**

Immunostaining of frozen E13.5 embryo sections, using anti- $\beta$ -galactosidase (staining melanoblasts in red) and anti-cleaved caspase 3 antibodies (staining apoptotic cells in green). Images are merged to reveal apoptotic melanoblasts. (B) Quantification of apoptotic epidermal and dermal melanoblasts between E12.5 and E14.5 in  $\Delta$ bcat, wt, and bcat\* embryos. Note that no apoptotic melanoblasts were detected in mice of any of the three genotypes.
